# Supplementary material for: Z-Guggulsterone Is a Potential Lead Molecule of Dawa-ul-Kurkum against Hepatocellular Carcinoma
Source: MDPI journal article supplement (doi:10.3390/molecules27165104), 2022-08-11
Supplement: s1 [file s1]

**Table S1:** Predicted binding affinity (docking scores) and inhibition constant of the ten selected active constituents of Dawa-ul-Kurkum against the target proteins involved in different stages of hepatocellular carcinoma. For each protein, the active constituents are tabulated in descending order of binding affinity.

| S. No. | Proteins Involved/<br>PDB ID | Biological activity/Pathway | Active constituents   | Name of the plant                         | Binding affinity (Kcal/Mol) | Inhibition constant, Ki (μM) |
|--------|------------------------------|-----------------------------|-----------------------|-------------------------------------------|-----------------------------|------------------------------|
| 1.     | Cyclin E1/1W98               | Cell cycle regulator        | Z-Guggulsterone       | <i>Commiphora wightii</i>                 | -7.5                        | 3.17997                      |
|        |                              |                             | Crocin                | <i>Crocus sativus</i>                     | -7.0                        | 7.39482                      |
|        |                              |                             | Dehydrocostus lactone | <i>Saussurea lappa</i>                    | -6.8                        | 10.3641                      |
|        |                              |                             | Jatamansone           | <i>Nardostachys jatamansi</i>             | -6.7                        | 12.2696                      |
|        |                              |                             | Crocin                | <i>Crocus sativus</i>                     | -6.5                        | 17.1962                      |
|        |                              |                             | p-Coumaric acid       | <i>Cinnamomum cassia</i>                  | -5.0                        | 216.246                      |
|        |                              |                             | Citral                | <i>Cymbopogon jwarancusa</i>              | -5.0                        | 216.246                      |
|        |                              |                             | Safranal              | <i>Crocus sativus</i>                     | -5.0                        | 216.246                      |
|        |                              |                             | Cinnamaldehyde        | <i>Cinnamomum cassia &amp; zeylanicum</i> | -4.8                        | 303.075                      |
|        |                              |                             | Isovaleric acid       | <i>Nardostachys jatamansi</i>             | -3.8                        | 1638.931                     |
| 2.     | Cyclin D1 (CCND1)/ 2W9F      | Tumor differentiation       | Z-Guggulsterone       | <i>Commiphora wightii</i>                 | -7.4                        | 3.76464                      |
|        |                              |                             | Dehydrocostus lactone | <i>Saussurea lappa</i>                    | -7.2                        | 5.27625                      |
|        |                              |                             | Crocin                | <i>Crocus sativus</i>                     | -6.4                        | 20.3579                      |
|        |                              |                             | Crocin                | <i>Crocus sativus</i>                     | -6.3                        | 24.101                       |
|        |                              |                             | p-Coumaric acid       | <i>Cinnamomum cassia</i>                  | -6.2                        | 28.5322                      |
|        |                              |                             | Jatamansone           | <i>Nardostachys jatamansi</i>             | -6.0                        | 39.9888                      |

|    |                      |                                                 |                          |                                           |      |          |
|----|----------------------|-------------------------------------------------|--------------------------|-------------------------------------------|------|----------|
|    |                      |                                                 | Safranal                 | <i>Crocus sativus</i>                     | -5.4 | 110.089  |
|    |                      |                                                 | Cinnamaldehyde           | <i>Cinnamomum cassia &amp; zeylanicum</i> | -5.3 | 130.33   |
|    |                      |                                                 | Citral                   | <i>Cymbopogon jwarancusa</i>              | -4.8 | 303.075  |
|    |                      |                                                 | Isovaleric acid          | <i>Nardostachys jatamansi</i>             | -3.6 | 2297.009 |
| 3. | Fibronectin/<br>1FNF | Provokes late<br>stages of cancer<br>metastasis | Z-Guggulsterone          | <i>Commiphora wightii</i>                 | -7.3 | 4.45681  |
|    |                      |                                                 | Crocin                   | <i>Crocus sativus</i>                     | -6.3 | 24.101   |
|    |                      |                                                 | Dehydrocostus<br>lactone | <i>Saussurea lappa</i>                    | -6.2 | 28.5322  |
|    |                      |                                                 | Crocin                   | <i>Crocus sativus</i>                     | -5.9 | 47.3412  |
|    |                      |                                                 | Jatamansone              | <i>Nardostachys jatamansi</i>             | -5.7 | 66.35    |
|    |                      |                                                 | p-Coumaric acid          | <i>Cinnamomum cassia</i>                  | -4.9 | 256.006  |
|    |                      |                                                 | Safranal                 | <i>Crocus sativus</i>                     | -4.7 | 358.799  |
|    |                      |                                                 | Citral                   | <i>Cymbopogon jwarancusa</i>              | -4.5 | 502.867  |
|    |                      |                                                 | Cinnamaldehyde           | <i>Cinnamomum cassia &amp; zeylanicum</i> | -4.4 | 595.325  |
|    |                      |                                                 | Isovaleric acid          | <i>Nardostachys jatamansi</i>             | -4.1 | 987.774  |

|    |                                         |                     |                          |                                                   |      |          |
|----|-----------------------------------------|---------------------|--------------------------|---------------------------------------------------|------|----------|
| 4. | Peroxiredox<br>in 2<br>(PRDX2)/<br>1QMV | ROS reduction       | Z-Guggulsterone          | <i>Commiphora<br/>wightii</i>                     | -7.3 | 4.45681  |
|    |                                         |                     | Crocin                   | <i>Crocus sativus</i>                             | -6.4 | 20.3579  |
|    |                                         |                     | Crocetin                 | <i>Crocus sativus</i>                             | -6.2 | 28.5322  |
|    |                                         |                     | Dehydrocostus<br>lactone | <i>Saussurea lappa</i>                            | -6.2 | 28.5322  |
|    |                                         |                     | Jatamansone              | <i>Nardostachys<br/>jatamansi</i>                 | -5.8 | 56.0454  |
|    |                                         |                     | p-Coumaric acid          | <i>Cinnamomum<br/>cassia</i>                      | -5.2 | 154.293  |
|    |                                         |                     | Safranal                 | <i>Crocus sativus</i>                             | -4.6 | 424.769  |
|    |                                         |                     | Cinnamaldehyde           | <i>Cinnamomum<br/>cassia &amp;<br/>zeylanicum</i> | -4.6 | 424.769  |
|    |                                         |                     | Citral                   | <i>Cymbopogon<br/>jwarancusa</i>                  | -4.4 | 595.325  |
| 5. | Transgelin/<br>1WYM                     | NF-κB<br>signalling | Isovaleric acid          | <i>Nardostachys<br/>jatamansi</i>                 | -4.0 | 1169.388 |
|    |                                         |                     | Z-Guggulsterone          | <i>Commiphora<br/>wightii</i>                     | -7.7 | 2.26893  |
|    |                                         |                     | Crocetin                 | <i>Crocus sativus</i>                             | -6.8 | 10.3641  |
|    |                                         |                     | Dehydrocostus<br>lactone | <i>Saussurea lappa</i>                            | -6.6 | 14.5255  |
|    |                                         |                     | Jatamansone              | <i>Nardostachys<br/>jatamansi</i>                 | -6.2 | 28.5322  |
|    |                                         |                     | Citral                   | <i>Cymbopogon<br/>jwarancusa</i>                  | -5.8 | 56.0454  |
|    |                                         |                     | p-Coumaric acid          | <i>Cinnamomum<br/>cassia</i>                      | -5.8 | 56.0454  |
|    |                                         |                     | Cinnamaldehyde           | <i>Cinnamomum<br/>cassia &amp;<br/>zeylanicum</i> | -5.8 | 56.0454  |
|    |                                         |                     | Crocin                   | <i>Crocus sativus</i>                             | -5.7 | 66.35    |

|    |                                             |                                                                               |                       |                                           |      |          |
|----|---------------------------------------------|-------------------------------------------------------------------------------|-----------------------|-------------------------------------------|------|----------|
|    |                                             |                                                                               | Safranal              | <i>Crocus sativus</i>                     | -5.2 | 154.293  |
|    |                                             |                                                                               | Isovaleric acid       | <i>Nardostachys jatamansi</i>             | -4.4 | 595.325  |
| 6. | Protein disulfide-isomerase A3 (PDIA3)/2DMM | Increase in cancer cell proliferation and a reduction in apoptotic cell death | Z-Guggulsterone       | <i>Commiphora wightii</i>                 | -7.3 | 4.45681  |
|    |                                             |                                                                               | Crocin                | <i>Crocus sativus</i>                     | -6.6 | 14.5255  |
|    |                                             |                                                                               | Dehydrocostus lactone | <i>Saussurea lappa</i>                    | -6.2 | 28.5322  |
|    |                                             |                                                                               | Jatamansone           | <i>Nardostachys jatamansi</i>             | -5.8 | 56.0454  |
|    |                                             |                                                                               | Crocetin              | <i>Crocus sativus</i>                     | -5.8 | 56.0454  |
|    |                                             |                                                                               | p-Coumaric acid       | <i>Cinnamomum cassia</i>                  | -5.1 | 182.662  |
|    |                                             |                                                                               | Safranal              | <i>Crocus sativus</i>                     | -4.8 | 303.075  |
|    |                                             |                                                                               | Cinnamaldehyde        | <i>Cinnamomum cassia &amp; zeylanicum</i> | -4.4 | 595.325  |
|    |                                             |                                                                               | Citral                | <i>Cymbopogon jwarancusa</i>              | -4.2 | 834.366  |
|    |                                             |                                                                               | Isovaleric acid       | <i>Nardostachys jatamansi</i>             | -4.0 | 1169.388 |
|    | 2H8L                                        |                                                                               | Z-Guggulsterone       | <i>Commiphora wightii</i>                 | -7.4 | 3.76464  |
|    |                                             |                                                                               | Dehydrocostus lactone | <i>Saussurea lappa</i>                    | -6.6 | 14.5255  |
|    |                                             |                                                                               | Crocin                | <i>Crocus sativus</i>                     | -6.4 | 20.357   |
|    |                                             |                                                                               | Crocetin              | <i>Crocus sativus</i>                     | -6.3 | 24.101   |
|    |                                             |                                                                               | Cinnamaldehyde        | <i>Cinnamomum cassia &amp; zeylanicum</i> | -5.6 | 78.5493  |
|    |                                             |                                                                               | Jatamansone           | <i>Nardostachys jatamansi</i>             | -5.4 | 110.089  |

|    |                                           |                                  |                       |                                           |      |          |
|----|-------------------------------------------|----------------------------------|-----------------------|-------------------------------------------|------|----------|
|    |                                           |                                  | p-Coumaric acid       | <i>Cinnamomum cassia</i>                  | -5.2 | 154.293  |
|    |                                           |                                  | Safranal              | <i>Crocus sativus</i>                     | -5.0 | 216.246  |
|    |                                           |                                  | Isovaleric acid       | <i>Nardostachys jatamansi</i>             | -4.5 | 502.867  |
|    |                                           |                                  | Citral                | <i>Cymbopogon jwarancusa</i>              | -4.2 | 834.366  |
| 7. | Insulin-like growth factor 2 (IGF2)/ 2H7T | Receptor tyrosine kinase pathway | Z-Guggulsterone       | <i>Commiphora wightii</i>                 | -7.7 | 2.26893  |
|    |                                           |                                  | Dehydrocostus lactone | <i>Saussurea lappa</i>                    | -6.8 | 10.3641  |
|    |                                           |                                  | Crocin                | <i>Crocus sativus</i>                     | -6.5 | 17.1962  |
|    |                                           |                                  | Crocetin              | <i>Crocus sativus</i>                     | -6.4 | 20.3579  |
|    |                                           |                                  | Jatamansone           | <i>Nardostachys jatamansi</i>             | -5.9 | 47.3412  |
|    |                                           |                                  | Safranal              | <i>Crocus sativus</i>                     | -5.1 | 182.662  |
|    |                                           |                                  | p-Coumaric acid       | <i>Cinnamomum cassia</i>                  | -5.0 | 216.246  |
|    |                                           |                                  | Cinnamaldehyde        | <i>Cinnamomum cassia &amp; zeylanicum</i> | -4.5 | 502.867  |
|    |                                           |                                  | Citral                | <i>Cymbopogon jwarancusa</i>              | -4.5 | 502.867  |
|    |                                           |                                  | Isovaleric acid       | <i>Nardostachys jatamansi</i>             | -3.7 | 1940.268 |
| 8. | S100A14/ 2M0R                             | RAF/ERK/MAP K pathway            | Z-Guggulsterone       | <i>Commiphora wightii</i>                 | -8.1 | 1.15509  |
|    |                                           |                                  | Dehydrocostus lactone | <i>Saussurea lappa</i>                    | -8.1 | 1.15509  |
|    |                                           |                                  | Crocetin              | <i>Crocus sativus</i>                     | -6.5 | 17.1962  |
|    |                                           |                                  | Jatamansone           | <i>Nardostachys jatamansi</i>             | -6.3 | 24.101   |
|    |                                           |                                  | Safranal              | <i>Crocus sativus</i>                     | -6.0 | 39.9888  |

|     |                                        |                               |                       |                                           |      |          |
|-----|----------------------------------------|-------------------------------|-----------------------|-------------------------------------------|------|----------|
|     |                                        |                               | Crocin                | <i>Crocus sativus</i>                     | -5.8 | 56.0454  |
|     |                                        |                               | Citral                | <i>Cymbopogon jwarancusa</i>              | -5.8 | 56.0454  |
|     |                                        |                               | p-Coumaric acid       | <i>Cinnamomum cassia</i>                  | -5.4 | 110.089  |
|     |                                        |                               | Cinnamaldehyde        | <i>Cinnamomum cassia &amp; zeylanicum</i> | -5.3 | 130.33   |
|     |                                        |                               | Isovaleric acid       | <i>Nardostachys jatamansi</i>             | -4.2 | 834.366  |
| 9.  | Cyclin-dependent kinase 4 (CDK4)/ 2W99 | TGF- $\beta$ signalling       | Z-Guggulsterone       | <i>Commiphora wightii</i>                 | -8.2 | 0.975697 |
|     |                                        |                               | Dehydrocostus lactone | <i>Saussurea lappa</i>                    | -8.2 | 0.975697 |
|     |                                        |                               | Crocin                | <i>Crocus sativus</i>                     | -7.3 | 4.45681  |
|     |                                        |                               | Jatamansone           | <i>Nardostachys jatamansi</i>             | -7.3 | 4.45681  |
|     |                                        |                               | Crocin                | <i>Crocus sativus</i>                     | -7.0 | 7.39482  |
|     |                                        |                               | p-Coumaric acid       | <i>Cinnamomum cassia</i>                  | -6.2 | 28.5322  |
|     |                                        |                               | Safranal              | <i>Crocus sativus</i>                     | -6.2 | 28.5322  |
|     |                                        |                               | Cinnamaldehyde        | <i>Cinnamomum cassia &amp; zeylanicum</i> | -5.4 | 110.089  |
|     |                                        |                               | Citral                | <i>Cymbopogon jwarancusa</i>              | -5.3 | 130.33   |
|     |                                        |                               | Isovaleric acid       | <i>Nardostachys jatamansi</i>             | -4.2 | 834.366  |
| 10. | Spondin-2/ 3D34                        | Wnt/ $\beta$ -catenin pathway | Z-Guggulsterone       | <i>Commiphora wightii</i>                 | -7.3 | 4.45681  |
|     |                                        |                               | Dehydrocostus lactone | <i>Saussurea lappa</i>                    | -6.7 | 12.2696  |
|     |                                        |                               | Jatamansone           | <i>Nardostachys jatamansi</i>             | -6.3 | 24.101   |

|     |                                            |                                             |                       |                                           |      |           |
|-----|--------------------------------------------|---------------------------------------------|-----------------------|-------------------------------------------|------|-----------|
|     |                                            |                                             | Crocin                | <i>Crocus sativus</i>                     | -6.0 | 39.9888   |
|     |                                            |                                             | Crocetin              | <i>Crocus sativus</i>                     | -5.9 | 47.3412   |
|     |                                            |                                             | p-Coumaric acid       | <i>Cinnamomum cassia</i>                  | -5.2 | 154.293   |
|     |                                            |                                             | Safranal              | <i>Crocus sativus</i>                     | -5.2 | 154.293   |
|     |                                            |                                             | Citral                | <i>Cymbopogon jwarancusa</i>              | -4.8 | 303.075   |
|     |                                            |                                             | Cinnamaldehyde        | <i>Cinnamomum cassia &amp; zeylanicum</i> | -4.5 | 502.867   |
|     |                                            |                                             | Isovaleric acid       | <i>Nardostachys jatamansi</i>             | -3.9 | 1384.394  |
| 11. | Bone marrow stromal antigen 2 (BST2)/ 3NWH | pERK pathway; NF-κB signalling              | Z-Guggulsterone       | <i>Commiphora wightii</i>                 | -5.7 | 6.635E-05 |
|     |                                            |                                             | Dehydrocostus lactone | <i>Saussurea lappa</i>                    | -5.4 | 110.089   |
|     |                                            |                                             | Crocetin              | <i>Crocus sativus</i>                     | -5.3 | 130.33    |
|     |                                            |                                             | Crocin                | <i>Crocus sativus</i>                     | -4.4 | 595.325   |
|     |                                            |                                             | Jatamansone           | <i>Nardostachys jatamansi</i>             | -4.2 | 834.366   |
|     |                                            |                                             | p-Coumaric acid       | <i>Cinnamomum cassia</i>                  | -4.0 | 1169.388  |
|     |                                            |                                             | Safranal              | <i>Crocus sativus</i>                     | -4.0 | 1169.388  |
|     |                                            |                                             | Citral                | <i>Cymbopogon jwarancusa</i>              | -3.7 | 1940.268  |
|     |                                            |                                             | Cinnamaldehyde        | <i>Cinnamomum cassia &amp; zeylanicum</i> | -3.5 | 2719.342  |
|     |                                            |                                             | Isovaleric acid       | <i>Nardostachys jatamansi</i>             | -3.1 | 5341.558  |
| 12. | C-reactive protein (CRP)/ 3PVN             | Progression of tumor-promoting inflammation | Z-Guggulsterone       | <i>Commiphora wightii</i>                 | -7.1 | 6.24635   |
|     |                                            |                                             | Dehydrocostus lactone | <i>Saussurea lappa</i>                    | -7.1 | 6.24635   |

|     |                        |                               |                       |                                           |      |          |
|-----|------------------------|-------------------------------|-----------------------|-------------------------------------------|------|----------|
|     |                        |                               | Jatamansone           | <i>Nardostachys jatamansi</i>             | -6.5 | 17.1962  |
|     |                        |                               | Crocin                | <i>Crocus sativus</i>                     | -6.3 | 24.101   |
|     |                        |                               | Crocin                | <i>Crocus sativus</i>                     | -6.1 | 33.7782  |
|     |                        |                               | p-Coumaric acid       | <i>Cinnamomum cassia</i>                  | -5.5 | 92.9915  |
|     |                        |                               | Safranal              | <i>Crocus sativus</i>                     | -5.1 | 182.662  |
|     |                        |                               | Citral                | <i>Cymbopogon jwarancusa</i>              | -4.8 | 303.075  |
|     |                        |                               | Cinnamaldehyde        | <i>Cinnamomum cassia &amp; zeylanicum</i> | -4.7 | 358.799  |
|     |                        |                               | Isovaleric acid       | <i>Nardostachys jatamansi</i>             | -3.9 | 1384.394 |
| 13. | Peroxioredox in 6/5B6M | Ras and JAK/STAT pathway      | Z-Guggulsterone       | <i>Commiphora wightii</i>                 | -7.4 | 3.76464  |
|     |                        |                               | Crocin                | <i>Crocus sativus</i>                     | -6.5 | 17.1962  |
|     |                        |                               | Dehydrocostus lactone | <i>Saussurea lappa</i>                    | -6.2 | 28.5322  |
|     |                        |                               | Crocin                | <i>Crocus sativus</i>                     | -6.0 | 39.9888  |
|     |                        |                               | Jatamansone           | <i>Nardostachys jatamansi</i>             | -5.9 | 47.3412  |
|     |                        |                               | p-Coumaric acid       | <i>Cinnamomum cassia</i>                  | -5.1 | 182.662  |
|     |                        |                               | Safranal              | <i>Crocus sativus</i>                     | -4.6 | 424.769  |
|     |                        |                               | Cinnamaldehyde        | <i>Cinnamomum cassia &amp; zeylanicum</i> | -4.5 | 502.867  |
|     |                        |                               | Citral                | <i>Cymbopogon jwarancusa</i>              | -4.3 | 704.783  |
|     |                        |                               | Isovaleric acid       | <i>Nardostachys jatamansi</i>             | -3.8 | 1638.931 |
| 14. | Prohibitin/6IQE        | Proliferation, metastasis and | Z-Guggulsterone       | <i>Commiphora wightii</i>                 | -6.5 | 17.1962  |



|     |                                               |                        |                       |                                           |      |          |
|-----|-----------------------------------------------|------------------------|-----------------------|-------------------------------------------|------|----------|
|     |                                               | apoptosis              | Crocin                | <i>Crocus sativus</i>                     | -5.8 | 56.0454  |
|     |                                               |                        | Dehydrocostus lactone | <i>Saussurea lappa</i>                    | -5.7 | 66.35    |
|     |                                               |                        | Crocin                | <i>Crocus sativus</i>                     | -5.5 | 92.9915  |
|     |                                               |                        | Jatamansone           | <i>Nardostachys jatamansi</i>             | -5.4 | 110.089  |
|     |                                               |                        | Isovaleric acid       | <i>Nardostachys jatamansi</i>             | -4.3 | 704.783  |
|     |                                               |                        | Citral                | <i>Cymbopogon jwarancusa</i>              | -4.1 | 987.774  |
|     |                                               |                        | p-Coumaric acid       | <i>Cinnamomum cassia</i>                  | -4.0 | 1169.388 |
|     |                                               |                        | Cinnamaldehyde        | <i>Cinnamomum cassia &amp; zeylanicum</i> | -3.9 | 1384.394 |
|     |                                               |                        | Safranal              | <i>Crocus sativus</i>                     | -3.9 | 1384.394 |
| 15. | C-X-C motif chemokine ligand 10 (CXCL10)/107Y | Migration and invasion | Z-Guggulsterone       | <i>Commiphora wightii</i>                 | -5.9 | 47.3412  |
|     |                                               |                        | Crocin                | <i>Crocus sativus</i>                     | -5.5 | 92.9915  |
|     |                                               |                        | Dehydrocostus lactone | <i>Saussurea lappa</i>                    | -5.4 | 110.089  |
|     |                                               |                        | Crocin                | <i>Crocus sativus</i>                     | -4.9 | 256.006  |
|     |                                               |                        | Jatamansone           | <i>Nardostachys jatamansi</i>             | -4.7 | 358.799  |
|     |                                               |                        | Cinnamaldehyde        | <i>Cinnamomum cassia &amp; zeylanicum</i> | -4.1 | 987.774  |
|     |                                               |                        | p-Coumaric acid       | <i>Cinnamomum cassia</i>                  | -4.1 | 987.774  |
|     |                                               |                        | Safranal              | <i>Crocus sativus</i>                     | -4.0 | 1169.388 |
|     |                                               |                        | Citral                | <i>Cymbopogon jwarancusa</i>              | -3.9 | 1384.394 |
| 16. | Ezrin/                                        | Invasion,              | Z-Guggulsterone       | <i>Commiphora</i>                         | -8.7 | 0.419575 |

|     |                                   |                              |                       |                                           |      |         |
|-----|-----------------------------------|------------------------------|-----------------------|-------------------------------------------|------|---------|
|     | 1NI2                              | migration and poor prognosis | Crocin                | <i>wightii</i><br><i>Crocus sativus</i>   | -7.3 | 4.45681 |
|     |                                   |                              | Dehydrocostus lactone | <i>Saussurea lappa</i>                    | -7.0 | 7.39482 |
|     |                                   |                              | Crocetin              | <i>Crocus sativus</i>                     | -6.5 | 17.1962 |
|     |                                   |                              | Jatamansone           | <i>Nardostachys jatamansi</i>             | -6.4 | 20.3579 |
|     |                                   |                              | p-Coumaric acid       | <i>Cinnamomum cassia</i>                  | -5.7 | 66.35   |
|     |                                   |                              | Safranal              | <i>Crocus sativus</i>                     | -5.3 | 130.33  |
|     |                                   |                              | Citral                | <i>Cymbopogon jwarancusa</i>              | -5.1 | 182.662 |
|     |                                   |                              | Cinnamaldehyde        | <i>Cinnamomum cassia &amp; zeylanicum</i> | -5.0 | 216.246 |
|     |                                   |                              | Isovaleric acid       | <i>Nardostachys jatamansi</i>             | -4.3 | 704.783 |
| 17. | Retinoblastoma protein (RB1)/1AD6 | Cell cycle modulator         | Z-Guggulsterone       | <i>Commiphora wightii</i>                 | -7.7 | 2.26893 |
|     |                                   |                              | Dehydrocostus lactone | <i>Saussurea lappa</i>                    | -7.0 | 7.39482 |
|     |                                   |                              | Crocin                | <i>Crocus sativus</i>                     | -6.6 | 14.5255 |
|     |                                   |                              | Crocetin              | <i>Crocus sativus</i>                     | -6.5 | 17.1962 |
|     |                                   |                              | Jatamansone           | <i>Nardostachys jatamansi</i>             | -6.4 | 20.3579 |
|     |                                   |                              | p-Coumaric acid       | <i>Cinnamomum cassia</i>                  | -5.4 | 110.089 |
|     |                                   |                              | Safranal              | <i>Crocus sativus</i>                     | -5.2 | 154.293 |
|     |                                   |                              | Cinnamaldehyde        | <i>Cinnamomum cassia &amp; zeylanicum</i> | -4.8 | 303.075 |
|     |                                   |                              | Citral                | <i>Cymbopogon jwarancusa</i>              | -4.7 | 358.799 |

|     |                                                    |                                       |                       |                                           |      |          |
|-----|----------------------------------------------------|---------------------------------------|-----------------------|-------------------------------------------|------|----------|
|     |                                                    |                                       | Isovaleric acid       | <i>Nardostachys jatamansi</i>             | -3.9 | 1384.394 |
| 18. | Axis inhibition protein 1 (AXIN1)/1DK8             | WNT/ $\beta$ -catenin pathway         | Z-Guggulsterone       | <i>Commiphora wightii</i>                 | -8.4 | 0.696166 |
|     |                                                    |                                       | Dehydrocostus lactone | <i>Saussurea lappa</i>                    | -6.0 | 39.9888  |
|     |                                                    |                                       | Jatamansone           | <i>Nardostachys jatamansi</i>             | -5.9 | 47.3412  |
|     |                                                    |                                       | Crocetin              | <i>Crocus sativus</i>                     | -5.8 | 56.0454  |
|     |                                                    |                                       | Crocin                | <i>Crocus sativus</i>                     | -5.2 | 154.293  |
|     |                                                    |                                       | p-Coumaric acid       | <i>Cinnamomum cassia</i>                  | -5.2 | 154.293  |
|     |                                                    |                                       | Safranal              | <i>Crocus sativus</i>                     | -4.7 | 358.799  |
|     |                                                    |                                       | Cinnamaldehyde        | <i>Cinnamomum cassia &amp; zeylanicum</i> | -4.6 | 424.769  |
|     |                                                    |                                       | Citral                | <i>Cymbopogon jwarancusa</i>              | -4.3 | 704.783  |
|     |                                                    |                                       | Isovaleric acid       | <i>Nardostachys jatamansi</i>             | -3.8 | 1638.931 |
| 19. | Insulin like growth factor 2 receptor (IGF2R)/1GP0 | TGF- $\beta$ -mediated growth control | Z-Guggulsterone       | <i>Commiphora wightii</i>                 | -6.8 | 10.3641  |
|     |                                                    |                                       | Crocetin              | <i>Crocus sativus</i>                     | -6.5 | 17.1962  |
|     |                                                    |                                       | Dehydrocostus lactone | <i>Saussurea lappa</i>                    | -6.0 | 39.9888  |
|     |                                                    |                                       | Jatamansone           | <i>Nardostachys jatamansi</i>             | -5.8 | 56.0454  |
|     |                                                    |                                       | Crocin                | <i>Crocus sativus</i>                     | -4.8 | 303.075  |
|     |                                                    |                                       | Citral                | <i>Cymbopogon jwarancusa</i>              | -4.8 | 303.075  |
|     |                                                    |                                       | p-Coumaric acid       | <i>Cinnamomum cassia</i>                  | -4.7 | 358.799  |
|     |                                                    |                                       | Safranal              | <i>Crocus sativus</i>                     | -4.5 | 502.867  |

|     |                                   |                                       |                       |                                           |      |          |
|-----|-----------------------------------|---------------------------------------|-----------------------|-------------------------------------------|------|----------|
|     |                                   |                                       | Cinnamaldehyde        | <i>Cinnamomum cassia &amp; zeylanicum</i> | -4.5 | 502.867  |
|     |                                   |                                       | Isovaleric acid       | <i>Nardostachys jatamansi</i>             | -3.7 | 1940.268 |
| 20. | SMAD Family Member 2 (SMAD2)/1KHX | TGF- $\beta$ -mediated growth control | Dehydrocostus lactone | <i>Saussurea lappa</i>                    | -7.4 | 3.76464  |
|     |                                   |                                       | Z-Guggulsterone       | <i>Commiphora wightii</i>                 | -7.4 | 3.76464  |
|     |                                   |                                       | Jatamansone           | <i>Nardostachys jatamansi</i>             | -6.5 | 17.1962  |
|     |                                   |                                       | Crocetin              | <i>Crocus sativus</i>                     | -6.4 | 20.3579  |
|     |                                   |                                       | Crocin                | <i>Crocus sativus</i>                     | -6.1 | 33.7782  |
|     |                                   |                                       | Safranal              | <i>Crocus sativus</i>                     | -5.9 | 47.3412  |
|     |                                   |                                       | p-Coumaric acid       | <i>Cinnamomum cassia</i>                  | -5.7 | 66.35    |
|     |                                   |                                       | Cinnamaldehyde        | <i>Cinnamomum cassia &amp; zeylanicum</i> | -5.5 | 92.9915  |
|     |                                   |                                       | Citral                | <i>Cymbopogon jwarancusa</i>              | -5.2 | 154.293  |
|     |                                   |                                       | Isovaleric acid       | <i>Nardostachys jatamansi</i>             | -4.5 | 502.867  |
| 21. | Aminoacylase 1/1Q7L               | TGF- $\beta$ 1 and ERK1 pathway       | Z-Guggulsterone       | <i>Commiphora wightii</i>                 | -7.7 | 2.26893  |
|     |                                   |                                       | Crocin                | <i>Crocus sativus</i>                     | -7.3 | 4.45681  |
|     |                                   |                                       | Crocetin              | <i>Crocus sativus</i>                     | -6.8 | 10.3641  |
|     |                                   |                                       | Dehydrocostus lactone | <i>Saussurea lappa</i>                    | -6.8 | 10.3641  |
|     |                                   |                                       | Jatamansone           | <i>Nardostachys jatamansi</i>             | -6.0 | 39.9888  |
|     |                                   |                                       | Citral                | <i>Cymbopogon jwarancusa</i>              | -4.9 | 256.006  |

|     |                                |                                                    |                       |                                           |      |          |
|-----|--------------------------------|----------------------------------------------------|-----------------------|-------------------------------------------|------|----------|
|     |                                |                                                    | p-Coumaric acid       | <i>Cinnamomum cassia</i>                  | -5.2 | 154.293  |
|     |                                |                                                    | Safranal              | <i>Crocus sativus</i>                     | -5.0 | 216.246  |
|     |                                |                                                    | Cinnamaldehyde        | <i>Cinnamomum cassia &amp; zeylanicum</i> | -4.6 | 424.769  |
|     |                                |                                                    | Isovaleric acid       | <i>Nardostachys jatamansi</i>             | -3.7 | 1940.268 |
| 22. | Tumor protein p53 (TP53)/ 1TUP | Cell cycle regulator; Ubiquitin-proteasome pathway | Z-Guggulsterone       | <i>Commiphora wightii</i>                 | -6.9 | 8.75444  |
|     |                                |                                                    | Crocin                | <i>Crocus sativus</i>                     | -6.0 | 39.9888  |
|     |                                |                                                    | Crocetin              | <i>Crocus sativus</i>                     | -6.0 | 39.9888  |
|     |                                |                                                    | Dehydrocostus lactone | <i>Saussurea lappa</i>                    | -6.0 | 39.9888  |
|     |                                |                                                    | Jatamansone           | <i>Nardostachys jatamansi</i>             | -5.3 | 130.33   |
|     |                                |                                                    | p-Coumaric acid       | <i>Cinnamomum cassia</i>                  | -4.8 | 303.075  |
|     |                                |                                                    | Safranal              | <i>Crocus sativus</i>                     | -4.6 | 424.769  |
|     |                                |                                                    | Cinnamaldehyde        | <i>Cinnamomum cassia &amp; zeylanicum</i> | -4.4 | 595.325  |
|     |                                |                                                    | Isovaleric acid       | <i>Nardostachys jatamansi</i>             | -4.4 | 595.325  |
|     |                                |                                                    | Citral                | <i>Cymbopogon jwarancusa</i>              | -4.0 | 1169.388 |

**Table S2:** Predicted binding affinity (docking scores) and inhibition constant of the ten selected active constituents of Dawa-ul-Kurkum against the target proteins involved in endoplasmic reticulum stress. For each protein, the active constituents are tabulated in descending order of binding affinity.

| S. No. | Proteins Involved/PD B ID                       | Biological activity/Pat hway    | Active constituents   | Name of the plant                         | Binding affinity (Kcal/Mol) | Inhibition constant, Ki (μM) |
|--------|-------------------------------------------------|---------------------------------|-----------------------|-------------------------------------------|-----------------------------|------------------------------|
| 1.     | Activating transcription factor 4 (ATF-4)/ 1CI6 | Signalling through PERK pathway | Z-Guggulsterone       | <i>Commiphora wightii</i>                 | -6.0                        | 39.9888                      |
|        |                                                 |                                 | Dehydrocostus lactone | <i>Saussurea lappa</i>                    | -5.5                        | 92.9915                      |
|        |                                                 |                                 | Croctin               | <i>Crocus sativus</i>                     | -5.3                        | 130.33                       |
|        |                                                 |                                 | Crocin                | <i>Crocus sativus</i>                     | -4.8                        | 303.075                      |
|        |                                                 |                                 | Jatamansone           | <i>Nardostachys jatamansi</i>             | -4.5                        | 502.867                      |
|        |                                                 |                                 | Citral                | <i>Cymbopogon jwarancusa</i>              | -4.0                        | 1169.388                     |
|        |                                                 |                                 | p-Coumaric acid       | <i>Cinnamomum cassia</i>                  | -3.9                        | 1384.394                     |
|        |                                                 |                                 | Safranal              | <i>Crocus sativus</i>                     | -3.8                        | 1638.931                     |
|        |                                                 |                                 | Cinnamaldehyde        | <i>Cinnamomum cassia &amp; zeylanicum</i> | -3.6                        | 2297.009                     |
|        |                                                 |                                 | Isovaleric acid       | <i>Nardostachys jatamansi</i>             | -3.2                        | 4511.977                     |
| 2.     | Death receptor 5 (DR5)/ 1D0G                    | Signalling through PERK         | Z-Guggulsterone       | <i>Commiphora wightii</i>                 | -6.3                        | 24.101                       |
|        |                                                 |                                 | Crocin                | <i>Crocus sativus</i>                     | -6.3                        | 24.101                       |
|        |                                                 |                                 | Dehydrocostus lactone | <i>Saussurea lappa</i>                    | -5.8                        | 56.0454                      |
|        |                                                 |                                 | Croctin               | <i>Crocus sativus</i>                     | -5.5                        | 92.9915                      |
|        |                                                 |                                 | Jatamansone           | <i>Nardostachys jatamansi</i>             | -5.0                        | 216.246                      |
|        |                                                 |                                 | p-Coumaric acid       | <i>Cinnamomum cassia</i>                  | -4.8                        | 303.075                      |

|    |                                                                            |                               |                       |                                                       |              |                     |
|----|----------------------------------------------------------------------------|-------------------------------|-----------------------|-------------------------------------------------------|--------------|---------------------|
|    |                                                                            |                               | Safranal<br>Citral    | <i>Crocus sativus</i><br><i>Cymbopogon jwarancusa</i> | -4.1<br>-4.0 | 987.774<br>1169.388 |
|    |                                                                            |                               | Cinnamaldehyde        | <i>Cinnamomum cassia &amp; zeylanicum</i>             | -3.9         | 1384.394            |
|    |                                                                            |                               | Isovaleric acid       | <i>Nardostachys jatamansi</i>                         | -3.7         | 1940.268            |
| 3. | P27Kip1/<br>1JSU                                                           | Signalling<br>through<br>PERK | Z-Guggulsterone       | <i>Commiphora wightii</i>                             | -7.1         | 6.24635             |
|    |                                                                            |                               | Crocin                | <i>Crocus sativus</i>                                 | -6.2         | 28.5322             |
|    |                                                                            |                               | Dehydrocostus lactone | <i>Saussurea lappa</i>                                | -6.2         | 28.5322             |
|    |                                                                            |                               | Jatamansone           | <i>Nardostachys jatamansi</i>                         | -5.8         | 56.0454             |
|    |                                                                            |                               | Crocin                | <i>Crocus sativus</i>                                 | -5.6         | 78.5493             |
|    |                                                                            |                               | Safranal              | <i>Crocus sativus</i>                                 | -4.7         | 358.799             |
|    |                                                                            |                               | Citral                | <i>Cymbopogon jwarancusa</i>                          | -4.5         | 502.867             |
|    |                                                                            |                               | p-Coumaric acid       | <i>Cinnamomum cassia</i>                              | -4.1         | 987.774             |
|    |                                                                            |                               | Cinnamaldehyde        | <i>Cinnamomum cassia &amp; zeylanicum</i>             | -3.9         | 1384.394            |
|    |                                                                            |                               | Isovaleric acid       | <i>Nardostachys jatamansi</i>                         | -3.5         | 2719.342            |
| 4. | Eukaryotic<br>Initiation<br>Factor 2 $\alpha$<br>(eIF2 $\alpha$ )/<br>1KL9 | Signalling<br>through<br>PERK | Z-Guggulsterone       | <i>Commiphora wightii</i>                             | -6.9         | 8.75444             |
|    |                                                                            |                               | Dehydrocostus lactone | <i>Saussurea lappa</i>                                | -6.7         | 12.2696             |
|    |                                                                            |                               | Crocin                | <i>Crocus sativus</i>                                 | -6.7         | 12.2696             |
|    |                                                                            |                               | Crocin                | <i>Crocus sativus</i>                                 | -6.1         | 33.7782             |
|    |                                                                            |                               | Jatamansone           | <i>Nardostachys jatamansi</i>                         | -5.9         | 47.3412             |

|    |                |                         |                       |                                           |      |         |
|----|----------------|-------------------------|-----------------------|-------------------------------------------|------|---------|
|    |                |                         | p-Coumaric acid       | <i>Cinnamomum cassia</i>                  | -5.3 | 130.33  |
|    |                |                         | Safranal              | <i>Crocus sativus</i>                     | -5.2 | 154.293 |
|    |                |                         | Cinnamaldehyde        | <i>Cinnamomum cassia &amp; zeylanicum</i> | -5.1 | 182.662 |
|    |                |                         | Citral                | <i>Cymbopogon jwarancusa</i>              | -4.8 | 303.075 |
|    |                |                         | Isovaleric acid       | <i>Nardostachys jatamansi</i>             | -4.1 | 987.774 |
| 5. | P58/2Y4T       | Signalling through ATF6 | Z-Guggulsterone       | <i>Commiphora wightii</i>                 | -7.2 | 5.27625 |
|    |                |                         | Jatamansone           | <i>Nardostachys jatamansi</i>             | -6.8 | 10.3641 |
|    |                |                         | Crocin                | <i>Crocus sativus</i>                     | -6.7 | 12.2696 |
|    |                |                         | Dehydrocostus lactone | <i>Saussurea lappa</i>                    | -6.4 | 20.3579 |
|    |                |                         | Crocin                | <i>Crocus sativus</i>                     | -6.2 | 28.5322 |
|    |                |                         | p-Coumaric acid       | <i>Cinnamomum cassia</i>                  | -5.7 | 66.35   |
|    |                |                         | Safranal              | <i>Crocus sativus</i>                     | -5.7 | 66.35   |
|    |                |                         | Cinnamaldehyde        | <i>Cinnamomum cassia &amp; zeylanicum</i> | -5.3 | 130.33  |
|    |                |                         | Citral                | <i>Cymbopogon jwarancusa</i>              | -5.1 | 182.662 |
|    |                |                         | Isovaleric acid       | <i>Nardostachys jatamansi</i>             | -4.4 | 595.325 |
| 6. | Caspase 3/3KJF | Signalling through IRE1 | Z-Guggulsterone       | <i>Commiphora wightii</i>                 | -6.6 | 14.5255 |
|    |                |                         | Crocin                | <i>Crocus sativus</i>                     | -6.1 | 33.7782 |
|    |                |                         | Dehydrocostus lactone | <i>Saussurea lappa</i>                    | -5.8 | 56.0454 |
|    |                |                         | Crocin                | <i>Crocus sativus</i>                     | -5.5 | 92.9915 |



|    |                                                                 |                         |                       |                                           |      |          |
|----|-----------------------------------------------------------------|-------------------------|-----------------------|-------------------------------------------|------|----------|
|    |                                                                 |                         | Jatamansone           | <i>Nardostachys jatamansi</i>             | -5.3 | 130.33   |
|    |                                                                 |                         | p-Coumaric acid       | <i>Cinnamomum cassia</i>                  | -4.6 | 424.769  |
|    |                                                                 |                         | Safranal              | <i>Crocus sativus</i>                     | -4.2 | 834.366  |
|    |                                                                 |                         | Citral                | <i>Cymbopogon jwarancusa</i>              | -4.2 | 834.366  |
|    |                                                                 |                         | Cinnamaldehyde        | <i>Cinnamomum cassia &amp; zeylanicum</i> | -3.9 | 1384.394 |
|    |                                                                 |                         | Isovaleric acid       | <i>Nardostachys jatamansi</i>             | -3.7 | 1940.268 |
| 7. | Growth arrest and DNA damage-inducible protein 34 (GADD34)/4XPN | Signalling through PERK | Z-Guggulsterone       | <i>Commiphora wightii</i>                 | -4.7 | 358.799  |
|    |                                                                 |                         | Crocin                | <i>Crocus sativus</i>                     | -4.4 | 595.325  |
|    |                                                                 |                         | Crocin                | <i>Crocus sativus</i>                     | -4.3 | 704.783  |
|    |                                                                 |                         | Dehydrocostus lactone | <i>Saussurea lappa</i>                    | -4.1 | 987.774  |
|    |                                                                 |                         | Jatamansone           | <i>Nardostachys jatamansi</i>             | -3.7 | 1940.268 |
|    |                                                                 |                         | p-Coumaric acid       | <i>Cinnamomum cassia</i>                  | -3.4 | 3219.325 |
|    |                                                                 |                         | Safranal              | <i>Crocus sativus</i>                     | -3.4 | 3219.325 |
|    |                                                                 |                         | Citral                | <i>Cymbopogon jwarancusa</i>              | -3.2 | 4511.977 |
|    |                                                                 |                         | Cinnamaldehyde        | <i>Cinnamomum cassia &amp; zeylanicum</i> | -3.1 | 5341.558 |
|    |                                                                 |                         | Isovaleric acid       | <i>Nardostachys jatamansi</i>             | -2.8 | 8862.802 |
| 8. | Glucose regulated protein 78 (GRP78)/5E85                       | Signalling through ATF6 | Z-Guggulsterone       | <i>Commiphora wightii</i>                 | -8.1 | 1.15509  |
|    |                                                                 |                         | Crocin                | <i>Crocus sativus</i>                     | -7.0 | 7.39482  |

|  |      |  |                       |                                           |      |          |
|--|------|--|-----------------------|-------------------------------------------|------|----------|
|  |      |  | Dehydrocostus lactone | <i>Saussurea lappa</i>                    | -6.6 | 14.5255  |
|  |      |  | Jatamansone           | <i>Nardostachys jatamansi</i>             | -6.5 | 17.1962  |
|  |      |  | Crocin                | <i>Crocus sativus</i>                     | -6.1 | 33.7782  |
|  |      |  | p-Coumaric acid       | <i>Cinnamomum cassia</i>                  | -5.8 | 56.0454  |
|  |      |  | Citral                | <i>Cymbopogon jwarancusa</i>              | -5.7 | 66.35    |
|  |      |  | Safranal              | <i>Crocus sativus</i>                     | -5.3 | 130.33   |
|  |      |  | Cinnamaldehyde        | <i>Cinnamomum cassia &amp; zeylanicum</i> | -4.8 | 303.075  |
|  |      |  | Isovaleric acid       | <i>Nardostachys jatamansi</i>             | -4.0 | 1169.388 |
|  | 5EVZ |  | Crocin                | <i>Crocus sativus</i>                     | -8.8 | 0.354412 |
|  |      |  | Z-Guggulsterone       | <i>Commiphora wightii</i>                 | -7.7 | 2.26893  |
|  |      |  | Crocin                | <i>Crocus sativus</i>                     | -7.4 | 3.76464  |
|  |      |  | Dehydrocostus lactone | <i>Saussurea lappa</i>                    | -6.5 | 17.1962  |
|  |      |  | Jatamansone           | <i>Nardostachys jatamansi</i>             | -6.0 | 39.9888  |
|  |      |  | p-Coumaric acid       | <i>Cinnamomum cassia</i>                  | -6.0 | 39.9888  |
|  |      |  | Citral                | <i>Cymbopogon jwarancusa</i>              | -5.4 | 110.089  |
|  |      |  | Cinnamaldehyde        | <i>Cinnamomum cassia &amp; zeylanicum</i> | -5.4 | 110.089  |
|  |      |  | Safranal              | <i>Crocus sativus</i>                     | -5.3 | 130.33   |
|  |      |  | Isovaleric acid       | <i>Nardostachys jatamansi</i>             | -4.5 | 502.867  |

|     |                                                  |                               |                          |                                                   |      |          |
|-----|--------------------------------------------------|-------------------------------|--------------------------|---------------------------------------------------|------|----------|
| 9.  | Calreticulin/<br>5LK5                            | Protein<br>folding            | Z-Guggulsterone          | <i>Commiphora<br/>wightii</i>                     | -8.2 | 0.975697 |
|     |                                                  |                               | Crocin                   | <i>Crocus sativus</i>                             | -6.5 | 17.1962  |
|     |                                                  |                               | Dehydrocostus<br>lactone | <i>Saussurea lappa</i>                            | -6.4 | 20.3579  |
|     |                                                  |                               | Jatamansone              | <i>Nardostachys<br/>jatamansi</i>                 | -6.2 | 28.5322  |
|     |                                                  |                               | Crocetin                 | <i>Crocus sativus</i>                             | -6.0 | 39.9888  |
|     |                                                  |                               | Safranal                 | <i>Crocus sativus</i>                             | -5.5 | 92.9915  |
|     |                                                  |                               | p-Coumaric acid          | <i>Cinnamomum<br/>cassia</i>                      | -5.2 | 154.293  |
|     |                                                  |                               | Cinnamaldehyde           | <i>Cinnamomum<br/>cassia &amp;<br/>zeylanicum</i> | -4.8 | 303.075  |
|     |                                                  |                               | Citral                   | <i>Cymbopogon<br/>jwarancusa</i>                  | -4.5 | 502.867  |
| 10. | Protein<br>disulfide<br>isomerase<br>(PDI)/ 6I7S | Signalling<br>through<br>PERK | Isovaleric acid          | <i>Nardostachys<br/>jatamansi</i>                 | -4.4 | 595.325  |
|     |                                                  |                               | Z-Guggulsterone          | <i>Commiphora<br/>wightii</i>                     | -8.3 | 0.824165 |
|     |                                                  |                               | Crocin                   | <i>Crocus sativus</i>                             | -7.7 | 2.26893  |
|     |                                                  |                               | Dehydrocostus<br>lactone | <i>Saussurea lappa</i>                            | -7.3 | 4.45681  |
|     |                                                  |                               | Jatamansone              | <i>Nardostachys<br/>jatamansi</i>                 | -6.8 | 10.3641  |
|     |                                                  |                               | Crocetin                 | <i>Crocus sativus</i>                             | -6.8 | 10.3641  |
|     |                                                  |                               | Safranal                 | <i>Crocus sativus</i>                             | -6.0 | 39.9888  |
|     |                                                  |                               | p-Coumaric acid          | <i>Cinnamomum<br/>cassia</i>                      | -5.6 | 78.5493  |
|     |                                                  |                               | Citral                   | <i>Cymbopogon<br/>jwarancusa</i>                  | -5.4 | 110.089  |
|     |                                                  |                               | Cinnamaldehyde           | <i>Cinnamomum<br/>cassia &amp;</i>                | -5.3 | 130.33   |

|  |  |  |                 |                                                              |      |         |
|--|--|--|-----------------|--------------------------------------------------------------|------|---------|
|  |  |  | Isovaleric acid | <i>zeylanicum</i><br><i>Nardostachys</i><br><i>jatamansi</i> | -4.3 | 704.783 |
|--|--|--|-----------------|--------------------------------------------------------------|------|---------|

**Table S3:** Predicted binding affinity (docking scores) and inhibition constant of the three reference drugs against the target proteins involved in different stages of hepatocellular carcinoma and endoplasmic reticulum stress. For each protein, the reference drugs are tabulated in descending order of binding affinity.

| S. No. | Proteins Involved                      | PDB ID       | Reference drug                                                                 | Binding affinity (Kcal/Mol)                  | Inhibition constant, Ki ( $\mu$ M)                              |
|--------|----------------------------------------|--------------|--------------------------------------------------------------------------------|----------------------------------------------|-----------------------------------------------------------------|
| 1.     | Cyclin E1                              | 1W98         | Regorafenib<br>Sorafenib<br>Nivolumab                                          | -8.0<br>-7.7<br>-7.7                         | 1.36747<br>2.26893<br>2.26893                                   |
| 2.     | Cyclin D1 (CCND1)                      | 2W9F         | Regorafenib<br>Sorafenib<br>Nivolumab                                          | -7.7<br>-7.5<br>-7.0                         | 2.26893<br>3.17997<br>7.39482                                   |
| 3.     | Fibronectin                            | 1FNF         | Regorafenib<br>Sorafenib<br>Nivolumab                                          | -7.7<br>-7.5<br>-6.5                         | 2.26893<br>3.17997<br>17.1962                                   |
| 4.     | Peroxiredoxin 2 (PRDX2)                | 1QMV         | Regorafenib<br>Sorafenib<br>Nivolumab                                          | -7.5<br>-7.2<br>-6.5                         | 3.17997<br>5.27625<br>17.1962                                   |
| 5.     | Transgelin                             | 1WYM         | Sorafenib<br>Regorafenib<br>Nivolumab                                          | -7.7<br>-7.6<br>-7.2                         | 2.26893<br>2.6861<br>5.27625                                    |
| 6.     | Protein disulfide-isomerase A3 (PDIA3) | 2DMM<br>2H8L | Regorafenib<br>Sorafenib<br>Nivolumab<br>Regorafenib<br>Sorafenib<br>Nivolumab | -7.7<br>-7.5<br>-6.2<br>-9.2<br>-8.9<br>-6.8 | 2.26893<br>3.17997<br>28.5322<br>0.180428<br>0.29937<br>10.3641 |
| 7.     | Insulin-like growth factor 2 (IGF2)    | 2H7T         | Regorafenib<br>Sorafenib<br>Nivolumab                                          | -8.1<br>-7.7<br>-7.3                         | 1.15509<br>2.26893<br>4.45681                                   |
| 8.     | S100A14                                | 2M0R         | Regorafenib<br>Sorafenib<br>Nivolumab                                          | -8.0<br>-7.9<br>-7.0                         | 1.36747<br>1.61889<br>7.39482                                   |
| 9.     | Cyclin-dependent kinase 4 (CDK4)       | 2W99         | Regorafenib<br>Sorafenib<br>Nivolumab                                          | -8.9<br>-8.8<br>-7.0                         | 0.29937<br>0.354412<br>7.39482                                  |
| 10.    | Spondin-2                              | 3D34         | Regorafenib<br>Sorafenib<br>Nivolumab                                          | -7.6<br>-7.5<br>-6.4                         | 2.6861<br>3.17997<br>20.3579                                    |
| 11.    | Bone marrow stromal antigen 2 (BST2)   | 3NWH         | Sorafenib<br>Regorafenib<br>Nivolumab                                          | -6.7<br>-6.2<br>-4.9                         | 12.2696<br>28.5322<br>256.006                                   |
| 12.    | C-reactive protein (CRP)               | 3PVN         | Regorafenib<br>Sorafenib<br>Nivolumab                                          | -9.1<br>-8.7<br>-5.9                         | 0.213602<br>0.419575<br>47.3412                                 |
| 13.    | Peroxiredoxin 6                        | 5B6M         | Sorafenib<br>Regorafenib                                                       | -7.5<br>-7.4                                 | 3.17997<br>3.76464                                              |

|     |                                                          |      |             |      |          |
|-----|----------------------------------------------------------|------|-------------|------|----------|
|     |                                                          |      | Nivolumab   | -6.3 | 24.101   |
| 14. | Prohibitin                                               | 6IQE | Regorafenib | -6.4 | 20.3579  |
|     |                                                          |      | Sorafenib   | -6.4 | 20.3579  |
|     |                                                          |      | Nivolumab   | -6.0 | 39.9888  |
| 15. | C-X-C motif chemokine ligand 10 (CXCL10)                 | 1O7Y | Regorafenib | -6.4 | 20.3579  |
|     |                                                          |      | Sorafenib   | -6.4 | 20.3579  |
|     |                                                          |      | Nivolumab   | -6.0 | 39.9888  |
| 16. | Ezrin                                                    | 1NI2 | Sorafenib   | -8.6 | 0.496719 |
|     |                                                          |      | Regorafenib | -8.4 | 0.696166 |
|     |                                                          |      | Nivolumab   | -7.3 | 4.45681  |
| 17. | Retinoblastoma protein (RB1)                             | 1AD6 | Regorafenib | -8.3 | 0.824165 |
|     |                                                          |      | Sorafenib   | -8.1 | 1.15509  |
|     |                                                          |      | Nivolumab   | -6.9 | 8.75444  |
| 18. | Axis inhibition protein 1 (AXIN1)                        | 1DK8 | Regorafenib | -7.4 | 3.76464  |
|     |                                                          |      | Sorafenib   | -7.4 | 3.76464  |
|     |                                                          |      | Nivolumab   | -6.1 | 33.7782  |
| 19. | Insulin like growth factor 2 receptor (IGF2R)            | 1GP0 | Regorafenib | -8.0 | 1.36747  |
|     |                                                          |      | Sorafenib   | -7.9 | 1.61889  |
|     |                                                          |      | Nivolumab   | -5.6 | 78.5493  |
| 20. | SMAD Family Member 2 (SMAD2)                             | 1KHX | Sorafenib   | -8.5 | 0.588047 |
|     |                                                          |      | Regorafenib | -8.1 | 1.15509  |
|     |                                                          |      | Nivolumab   | -6.8 | 10.3641  |
| 21. | Aminoacylase 1                                           | 1Q7L | Sorafenib   | -8.6 | 0.496719 |
|     |                                                          |      | Regorafenib | -8.4 | 0.696166 |
|     |                                                          |      | Nivolumab   | -7.1 | 6.24635  |
| 22. | Tumor protein p53 (TP53)                                 | 1TUP | Regorafenib | -7.6 | 2.6861   |
|     |                                                          |      | Sorafenib   | -7.6 | 2.6861   |
|     |                                                          |      | Nivolumab   | -6.7 | 12.2696  |
| 23. | Activating transcription factor 4 (ATF-4)                | 1CI6 | Sorafenib   | -6.2 | 28.5322  |
|     |                                                          |      | Regorafenib | -6.1 | 33.7782  |
|     |                                                          |      | Nivolumab   | -4.9 | 256.006  |
| 24. | Death receptor 5 (DR5)                                   | 1D0G | Regorafenib | -7.1 | 6.24635  |
|     |                                                          |      | Sorafenib   | -6.9 | 8.75444  |
|     |                                                          |      | Nivolumab   | -6.1 | 33.7782  |
| 25. | P27Kip1                                                  | 1JSU | Sorafenib   | -7.6 | 2.6861   |
|     |                                                          |      | Regorafenib | -7.5 | 3.17997  |
|     |                                                          |      | Nivolumab   | -6.5 | 17.1962  |
| 26. | Eukaryotic Initiation Factor 2 $\alpha$ (eIF2 $\alpha$ ) | 1KL9 | Sorafenib   | -7.8 | 1.91655  |
|     |                                                          |      | Regorafenib | -7.6 | 2.6861   |
|     |                                                          |      | Nivolumab   | -6.6 | 14.5255  |
| 27. | P58                                                      | 2Y4T | Sorafenib   | -7.8 | 1.91655  |
|     |                                                          |      | Regorafenib | -7.2 | 5.27625  |
|     |                                                          |      | Nivolumab   | -6.6 | 14.5255  |
| 28. | Caspase 3                                                | 3KJF | Regorafenib | -7.4 | 3.76464  |
|     |                                                          |      | Sorafenib   | -7.1 | 6.24635  |

|     |                                                            |                  |                                                                                |                                              |                                                                    |
|-----|------------------------------------------------------------|------------------|--------------------------------------------------------------------------------|----------------------------------------------|--------------------------------------------------------------------|
|     |                                                            |                  | Nivolumab                                                                      | -5.8                                         | 56.0454                                                            |
| 29. | Growth arrest and DNA damage-inducible protein 34 (GADD34) | 4XPN             | Regorafenib<br>Sorafenib<br>Nivolumab                                          | -5.3<br>-5.1<br>-4.9                         | 130.33<br>182.662<br>256.006                                       |
| 30. | Glucose regulated protein 78 (GRP78)                       | 5E85<br><br>5EVZ | Regorafenib<br>Sorafenib<br>Nivolumab<br>Sorafenib<br>Regorafenib<br>Nivolumab | -9.2<br>-8.8<br>-7.3<br>-9.5<br>-8.7<br>-7.4 | 0.180428<br>0.354412<br>4.45681<br>0.108743<br>0.419575<br>3.76464 |
| 31. | Calreticulin                                               | 5LK5             | Regorafenib<br>Sorafenib<br>Nivolumab                                          | -7.5<br>-7.5<br>-6.4                         | 3.17997<br>3.17997<br>20.3579                                      |
| 32. | Protein disulfide isomerase (PDI)                          | 6I7S             | Regorafenib<br>Sorafenib<br>Nivolumab                                          | -8.5<br>-8.1<br>-7.1                         | 0.588047<br>1.15509<br>6.24635                                     |

**Table S4: Primer sequences for qRT-PCR**

| <b>Gene<br/>(Human)</b> | <b>Forward primer</b>           | <b>Reverse primer</b>           |
|-------------------------|---------------------------------|---------------------------------|
| Ezrin                   | 5'AGAAAGAGCAGATGATGCGCGAGA-3'   | 5'-AGGAGGGCAATCTTGGCAGTGTAT-3'  |
| ACY-1                   | 5'-GGCTGCATGAGGCTGTGTT-3'       | 5'-CTTGGCACTGGTTGGGATG-3        |
| Rb1                     | 5'-TTGGATCACAGCGATACAAACTT-3'   | 5'-AGCGCACGCCAATAAAGACAT-3'     |
| Calreticulin            | 5'-TGGCGTGCTGGGCCTGGACCTCTGG-3' | 5'-CCTCTTTGCGTTTCTTGTCTTCTTC-3' |
| β-Actin                 | 5'-TGGCACCCAGCACAAATGAA-3'      | 5'-CTAAGTCATAGTCCGCCTAGAAGCA-3' |



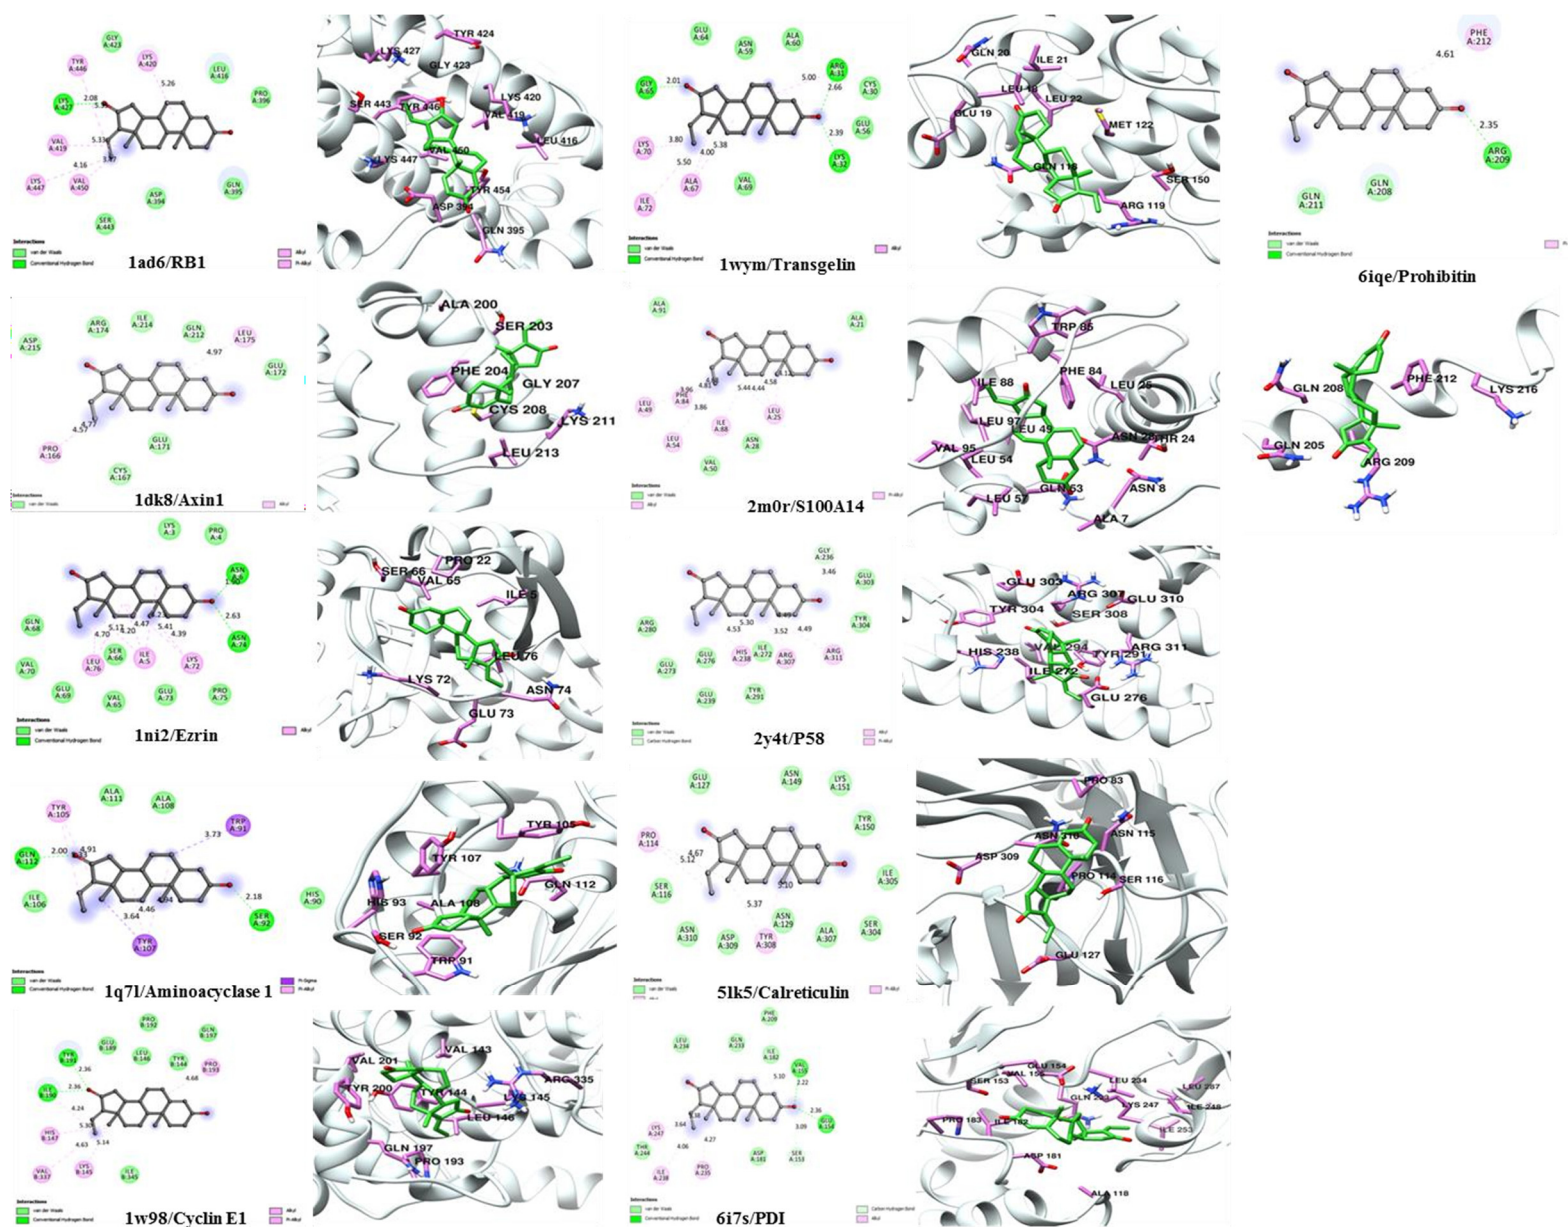

**Figure S1:** 2D interaction diagram (left) and 3D molecular dynamics simulation poses (right) for z-guggulsterone complexed with selected proteins: Cyclin E1, Ezrin, RB1, Aminoacylase, Transgelin, S100A14, Prohibitin, AXIN1, PDI, CRT and P58.

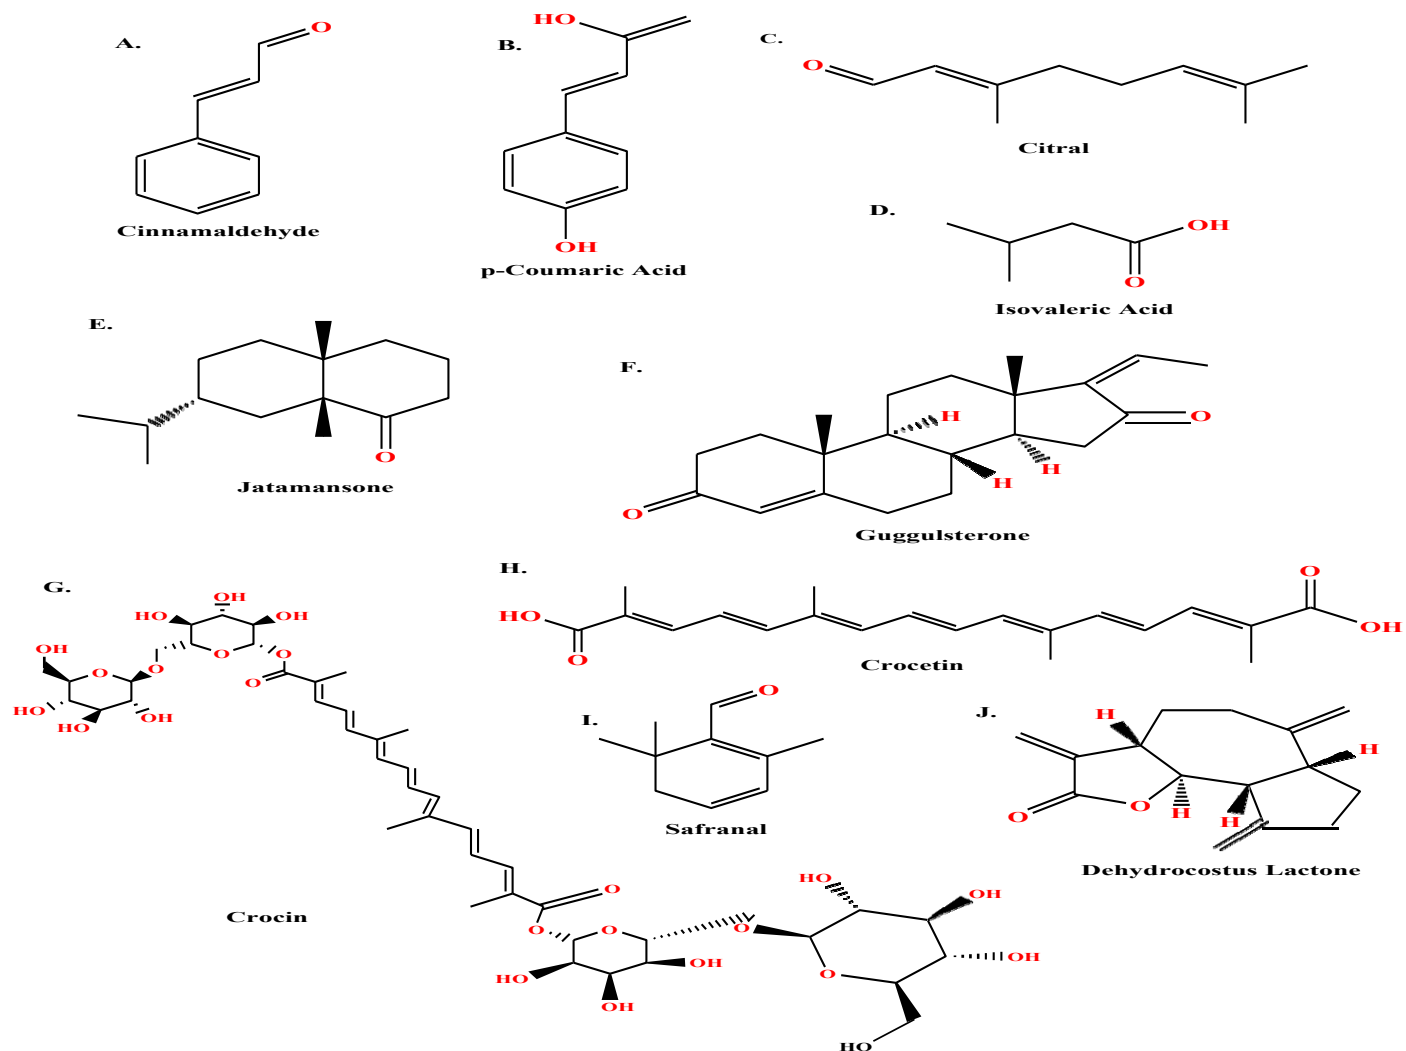

**Figure S2:** Chemical structure of the bioactive components of Duk.
